# Supplementary material
Source: Springer Nature journal article supplement (https://www.springermedizin.de/resource/supplementary/12885_2012_3799_MOESM2_ESM.pdf/9464478)
Supplement: MOESM2 [file 9464478]

**Supplementary Table 2 – Depiction of the PCR reaction mixture.**

|                                       | <i>PIK3CA</i><br>exon 9 | <i>PIK3CA</i><br>exon 20 | <i>BRAF</i><br>exon 11 | <i>BRAF</i><br>exon 15 | <i>KRAS</i><br>exon 3 | <i>KRAS</i><br>exon 4 |
|---------------------------------------|-------------------------|--------------------------|------------------------|------------------------|-----------------------|-----------------------|
| PCR reaction components               |                         |                          |                        |                        |                       |                       |
| 2,5x LightScanner® Master Mix [Idaho] | 1x                      | 1x                       | 1x                     | 1x                     | 1x                    | 1x                    |
| Reagent grade water [Idaho] (μL)      | 4,4                     | 4,4                      | 4,4                    | 4,4                    | 4,4                   | 4,1                   |
| Forward primer (nM)                   | 300                     | 300                      | 300                    | 300                    | 300                   | 200                   |
| Reverse primer (nM)                   | 300                     | 300                      | 300                    | 300                    | 300                   | 200                   |
| DNA (ng)                              | 20 -100                 | 20 -100                  | 20 -100                | 20 -100                | 20 -100               | 20 -100               |
| MgCl2 (mM)                            | -                       | -                        | -                      | -                      | -                     | 0,5                   |
| Total reaction volume (μL)            | 10                      | 10                       | 10                     | 10                     | 10                    | 10                    |
